# Supplementary material
Source: HighWire-hosted journal article supplement (https://www.cmajopen.ca/highwire/filestream/81036/field_highwire_adjunct_files/1/open-2016-0012-original-submission.pdf)
Supplement: open-2016-0012-original-submission.pdf [file open-2016-0012-original-submission.pdf]

**A cross-sectional survey to assess the knowledge, attitude, willingness, and readiness of primary health care providers of Niagara region, Ontario, to provide oral health services to children**

|                               |                                                                                                                                                                                                                                                                                                                                                                                                                                                                                                                                                                                                                                                                                                                                                                                                                                                                                                                                                                                                                                                                                                                                                                                                                                                                                                                                                                                                                                                                                        |
|-------------------------------|----------------------------------------------------------------------------------------------------------------------------------------------------------------------------------------------------------------------------------------------------------------------------------------------------------------------------------------------------------------------------------------------------------------------------------------------------------------------------------------------------------------------------------------------------------------------------------------------------------------------------------------------------------------------------------------------------------------------------------------------------------------------------------------------------------------------------------------------------------------------------------------------------------------------------------------------------------------------------------------------------------------------------------------------------------------------------------------------------------------------------------------------------------------------------------------------------------------------------------------------------------------------------------------------------------------------------------------------------------------------------------------------------------------------------------------------------------------------------------------|
| Journal:                      | <i>CMAJ Open</i>                                                                                                                                                                                                                                                                                                                                                                                                                                                                                                                                                                                                                                                                                                                                                                                                                                                                                                                                                                                                                                                                                                                                                                                                                                                                                                                                                                                                                                                                       |
| Manuscript ID                 | CMAJOpen-2016-0012                                                                                                                                                                                                                                                                                                                                                                                                                                                                                                                                                                                                                                                                                                                                                                                                                                                                                                                                                                                                                                                                                                                                                                                                                                                                                                                                                                                                                                                                     |
| Manuscript Type:              | Survey                                                                                                                                                                                                                                                                                                                                                                                                                                                                                                                                                                                                                                                                                                                                                                                                                                                                                                                                                                                                                                                                                                                                                                                                                                                                                                                                                                                                                                                                                 |
| Date Submitted by the Author: | 18-Jan-2016                                                                                                                                                                                                                                                                                                                                                                                                                                                                                                                                                                                                                                                                                                                                                                                                                                                                                                                                                                                                                                                                                                                                                                                                                                                                                                                                                                                                                                                                            |
| Complete List of Authors:     | Singhal, Sonica; University of Toronto, Faculty of Dentistry<br>Figueiredo, Rafael; Alberta Health Services<br>Dupuis, Sandy; Niagara Region Public Health<br>Skellet, Rachel; Niagara Region Public Health<br>Wincott, Tara; Niagara Region Public Health<br>Dyer, Carolyn; Niagara Region Public Health<br>Feller, Andrea; Niagara Region Public Health, ; McMaster University, Clinical Epidemiology and Biostatistics<br>Quinonez, Carlos; University of Toronto, Dentistry                                                                                                                                                                                                                                                                                                                                                                                                                                                                                                                                                                                                                                                                                                                                                                                                                                                                                                                                                                                                        |
| Keywords:                     | Dentistry and oral medicine, Health services research, Pediatrics                                                                                                                                                                                                                                                                                                                                                                                                                                                                                                                                                                                                                                                                                                                                                                                                                                                                                                                                                                                                                                                                                                                                                                                                                                                                                                                                                                                                                      |
| More Detailed Keywords:       |                                                                                                                                                                                                                                                                                                                                                                                                                                                                                                                                                                                                                                                                                                                                                                                                                                                                                                                                                                                                                                                                                                                                                                                                                                                                                                                                                                                                                                                                                        |
| Abstract:                     | <p>Background: Most children are exposed to medical care but not dental care at an early age, making primary healthcare (PHC) providers an important player in the reduction of tooth decay. The goal of this research was to understand the feasibility of utilizing PHC providers in promoting oral health, by assessing their knowledge, attitude, willingness and readiness in this regard.</p> <p>Methods: Using the Dillman method, a mail-in cross-sectional survey was conducted among all family physicians and pediatricians of the Niagara region, Ontario, who have primary contact with children. A descriptive analysis was performed.</p> <p>Results: Close to 70% (181/265) of providers responded. More than 90% know that untreated tooth decay could affect the general health of a child. More than 80% examine the oral cavity for more than 50% of their child patients. However, more than 50% are not aware that white spots or lines on the tooth surface are the first signs of tooth decay. Lack of clinical time was the top reason for not performing oral disease prevention measures.</p> <p>Interpretation: Overall, survey responses reflect a positive attitude and willingness to engage the oral health of children. To capitalize on this, there is a need to identify mechanisms of providing preventive oral healthcare services by PHC providers; including improving their oral health knowledge and addressing other potential barriers.</p> |
|                               |                                                                                                                                                                                                                                                                                                                                                                                                                                                                                                                                                                                                                                                                                                                                                                                                                                                                                                                                                                                                                                                                                                                                                                                                                                                                                                                                                                                                                                                                                        |

1  
2  
3  
4  
5  
6  
7  
8  
9  
10  
11  
12  
13  
14  
15  
16  
17  
18  
19  
20  
21  
22  
23  
24  
25  
26  
27  
28  
29  
30  
31  
32  
33  
34  
35  
36  
37  
38  
39  
40  
41  
42  
43  
44  
45  
46  
47  
48  
49  
50  
51  
52  
53  
54  
55  
56  
57  
58  
59  
60

SCHOLARONE™  
Manuscripts

Confidential

1  
2  
3 **A cross-sectional survey to assess the knowledge, attitude, willingness, and readiness of**  
4 **primary health care providers of Niagara region, Ontario, to provide oral health services to**  
5 **children**  
6  
7

8  
9 Sonica Singhal<sup>1\*</sup>, Rafael Figueiredo<sup>1</sup>, Sandy Dupuis<sup>2</sup>, Rachel Skellet<sup>2</sup>, Tara Wincott<sup>2</sup>, Carolyn  
10 Dyer<sup>2</sup>, Andrea Feller<sup>2</sup>, Carlos Quiñonez<sup>1</sup>  
11

12  
13  
14 <sup>1</sup> Discipline of Dental Public Health, Faculty of Dentistry, University of Toronto

15 <sup>2</sup> Niagara Region Public Health  
16

17 \*Corresponding author:  
18

19  
20 Sonica Singhal, BDS, PhD  
21

22  
23 Community Dental Health Services Research Unit,  
24

25 Discipline of Dental Public Health, Faculty of Dentistry, University of Toronto  
26

27  
28 Toronto, Ontario, Canada M5G 1G6  
29

30 Tel: 1-647-525-2077  
31

32  
33 Fax: 1-416-979-4936  
34

35  
36 [sonica.singhal@utoronto.ca](mailto:sonica.singhal@utoronto.ca)  
37  
38  
39  
40  
41

42 Word Count for manuscript: 2,395 (excluding title, abstract, acknowledgements, references, and  
43 tables)  
44  
45  
46  
47  
48  
49  
50  
51  
52  
53  
54  
55  
56  
57  
58  
59  
60

## **A cross-sectional survey to assess the knowledge, attitude, willingness, and readiness of primary health care providers of Niagara region, Ontario, to provide oral health services to children**

### **Introduction**

Dental caries (tooth decay) among children continues to be a major health problem in most industrialized countries.<sup>1</sup> According to the Canadian Health Measures Survey (CHMS), 56.8% of children aged 6-11 years, have or have had tooth decay.<sup>2</sup> Although the prevalence of tooth decay was higher among children from low-income families (61.4%), children from high-income families also experienced substantial levels of decay (51.1%).<sup>2</sup> While the socioeconomic gap is not as large as in other childhood diseases, children from low-income families continue to have limited access to dental care due to financial, language and cultural barriers, and a lack of perceived need for care.<sup>3-5</sup> Importantly, regardless of income, the poor oral health of children has serious implications for general health, for the health of families, and for the health care system.<sup>6</sup> In the Niagara region, dental surveillance conducted by registered dental hygienists in schools for the most recent school years, 2011/12, 2012/13, 2013/14, indicated that the DMFT/deft prevalence for children 4-13 years old was 40.8%, 44.0%, and 47.1% respectively. The prevalence among all school-age children over the three years has been steadily increasing; with unacceptably high rates among children who just enter school (JK/SK) and those in Grade 2; 35.1% and 65.2% (2013/14 rates).

Importantly, while tooth decay is one of the most common chronic diseases of childhood, it is largely preventable. Experts recommend that initiatives with very young children can promote positive oral and overall health during childhood and into adulthood.<sup>8</sup> Early contact with dental professionals can help reduce the burden of early childhood caries (ECC); however, the first contact with dental professionals is not as early as compared to other primary healthcare (PHC) providers. On average, by the age of three years, it is reported that children have approximately eleven well-child visits.<sup>9</sup> A study in the United States, based on the Medical Expenditure Panel Survey, demonstrated that 89% of infants and 1-year-olds had physician visits annually, compared with only 1.5% who had dental visits.<sup>10</sup> Thus, because most children are exposed to medical care but not dental care at an early age, PHC providers play an important role in reducing the burden of ECC.<sup>11</sup> To address child oral health issues, PHC providers must have adequate knowledge of the disease process, associated risk factors, signs and symptoms, prevention strategies, and fluoride usage,<sup>12</sup> but past studies have shown their lack of oral health knowledge in this regard.<sup>13-15</sup> A Canadian study showed that PHC providers, such as pediatricians and physicians, have knowledge about some aspects of ECC but are uncertain about identifying caries, and very few recommend the first dental visit by the child's first birthday.<sup>16</sup>

In the Niagara region, where community water fluoridation is not in place, other measures to reduce ECC need to be implemented. One preventive strategy proven to be effective is fluoride varnish; it is a topical fluoride product that is safe and effective, inexpensive and can reverse early decay and slow enamel destruction in active ECC. Evidence has shown that when used at least twice a year, fluoride varnish has led to a 38% reduction in dental decay.<sup>17</sup> Also, applying fluoride varnish in a primary care setting can be a cost-effective approach to reduce tooth decay.<sup>18</sup> For example, in the United States, Medicaid pays approximately \$15 to \$30 (USD) to

1  
2  
3 physicians and nurse practitioners for fluoride varnish application.<sup>19</sup> According to a study done  
4 by Hawkins and colleagues in two regions of Ontario, York and Hamilton, it costs approximately  
5 \$3.43 (CAD) for each varnish application, among children of age 3-6 years.<sup>20</sup> In non-fluoridated  
6 regions, such as Niagara region, appropriate usage of fluoride supplements also needs due  
7 consideration. In 1997, The Canadian Consensus Conference on the appropriate use of fluoride  
8 supplements for the prevention of dental caries in children established a protocol with guidelines  
9 for the use of fluoride supplements.<sup>21</sup> The recommendations suggested that fluoride supplements  
10 before the eruption of the first permanent tooth are generally not advisable and should be  
11 restricted to only high-risk individuals. To avoid the risk of dental fluorosis, appropriate dosages  
12 are recommended (Table 1). The total daily fluoride intake from all sources should not exceed  
13 0.05-0.07 mg F/kg body weight in order to minimize the risk of dental fluorosis. The current  
14 literature also suggests that PHC providers generally have a positive attitude towards the  
15 importance of oral health in children and are willing to perform oral health care activities.<sup>11, 16</sup>  
16 However, there is a consistent lack of knowledge on this issue, which affects their readiness to  
17 play an active role.<sup>16</sup> To begin an exploration of utilizing PHC providers in improving the oral  
18 health status of children in the Niagara region, Ontario, in 2013 a survey was distributed to  
19 assess their knowledge, attitude, willingness, and readiness to perform oral health care activities  
20 in their clinical settings.  
21  
22  
23  
24

## 25 26 **Methods**

27  
28 A cross-sectional survey was conducted among Niagara region PHC providers (family  
29 physicians and paediatricians) who have primary contact with children. The survey was sent to all  
30 family physicians and paediatricians, a list of which was obtained from the Niagara Region  
31 Public Health secure database. A 22-item questionnaire was designed based on previous surveys  
32 from the published literature. A modified Dillman approach was used.<sup>22</sup> The first mailing was  
33 sent through a registered post to 265 PHC providers. The package included an introduction letter,  
34 questionnaire, returning envelope with paid postage, and a gift certificate of \$25. Two weeks  
35 after the first mailing, a second mailing was sent to non-respondents. It included an introduction  
36 letter, questionnaire, and return envelope with paid postage, and was sent by regular mail. The  
37 same process was repeated after two weeks of the second mailing. After one week from the third  
38 mailing, a "Thank you" post card was sent to all 265 participants. Ethics approval was obtained  
39 from the Research Ethics Board of the University of Toronto (protocol reference # 29866).  
40  
41  
42  
43

## 44 **Data analysis**

45  
46 A descriptive analysis was performed and responses were tabulated accordingly. Responses of  
47 family physicians and paediatricians were observed separately; however, no statistical  
48 differences were explored between the two groups. Chi-square analysis was conducted to  
49 specifically observe if the attitude of PHC providers (physicians and paediatricians together, as  
50 number of paediatricians was small to conduct a separate analysis) in promoting oral health  
51 among children is associated with willingness to conduct preventive measures for tooth decay.  
52  
53

## 54 **Results**

1  
2  
3 Overall, 68.3% (181/265) of PHC providers responded; 66.9% (164/245) of family physicians  
4 and 85% (17/20) of paediatricians. Table 2 details the response rate for each of the three  
5 mailings. Table 3 describes the practice characteristics of family physicians and paediatricians in  
6 the Niagara region. The majority of paediatricians are in solo practice whereas family physicians  
7 are more involved in group practice. The majority of family physicians practice within a Family  
8 Health Organization or Family Health Group. Most family physicians and paediatricians have  
9 administrative staff in their practice; however, the proportion of nurses or nurse practitioners is  
10 much higher in family physicians offices (90.7%) as compared to paediatricians (31.3%).  
11  
12

### 13 **Knowledge of ECC, community water fluoridation, and topical fluorides**

14  
15  
16 Descriptive analysis reveals that the majority of family physicians and paediatricians know the  
17 importance of baby teeth, brushing children's teeth, and the implications of untreated dental  
18 decay; however, a large proportion (66.5% family physicians and 50% paediatricians) is not  
19 aware of the white spots or lines on the surface of teeth as the first signs of tooth decay (Table 4).  
20 In comparison to family physicians, paediatricians are more confident in identifying tooth decay  
21 among children and discussing with parents their child's oral health (81.3% vs. 57.9%). A large  
22 proportion of family physicians and paediatricians understand the importance of community  
23 water fluoridation; however, many (52.8% family physicians and 35.3% paediatricians) are not  
24 aware that the water supply in the Niagara region is not fluoridated. The majority of family  
25 physicians and paediatricians appreciated the importance of topical fluoride therapies for  
26 preventing tooth decay among children.  
27  
28  
29

### 30 **Readiness and willingness of dental screening, risk assessment and dental referral**

31  
32  
33 The majority of family physicians and paediatricians in the Niagara region visually examine the  
34 oral cavity and teeth of pediatric patients (Table 5). However, results reveal that a lower  
35 proportion advise parents regarding tooth cleaning methods or use of fluoridated toothpaste for  
36 their children. The majority of them never prescribe fluoride supplements. A greater proportion  
37 of paediatricians determine a child's risk for developing tooth decay as compared to family  
38 physicians.  
39

40  
41 Assessment of the willingness of family physicians and paediatricians to perform preventative  
42 oral health measures reveals that the majority is willing to lift the child's lip to check for tooth  
43 decay and advise parents regarding prevention measures for tooth decay (Tables 6 and 7). The  
44 majority is willing to formally refer suspected cases of tooth decay to dental professionals.  
45 Regarding prevention measures such as fluoride varnish, both paediatricians and family  
46 physicians showed a willingness to obtain more education on these topics; interestingly,  
47 paediatricians in comparison to family physicians were less willing to actually implement  
48 fluoride varnish for tooth decay.  
49  
50

51  
52 To understand what family physicians and paediatricians do to identify a child with tooth decay,  
53 specific questions were asked (Table 8). A large proportion advises parents to take their child to  
54 a dentist. A higher proportion of paediatricians than family physicians make a note in the  
55 medical chart. Surprisingly, no paediatrician reported making formal referrals to a dentist.  
56  
57  
58  
59  
60

## Perceived barriers in carrying out prevention measures aimed at dental problems

Lack of clinical time was the top reason for family physicians and paediatricians for not performing oral disease prevention measures in clinical settings (Table 9). Also, a large number assumes that the oral health care of children is the responsibility of dentists (42.2% family physicians and 50% paediatricians). A higher proportion of family physicians (52.2%) compared to paediatricians (25%) identified lack of knowledge regarding dental problems as a barrier to care.

## Attitude towards oral health care in children

Family physicians and paediatricians though assume that providing oral healthcare is the responsibility of dentists, they have a positive attitude (87.3%) when asked if their practice plays an important role in promoting oral health of children. Interestingly, those who felt that it is unimportant or of less importance were significantly less willing to perform preventive oral health care activities, including advising parents or formally referring children to dental professionals (Table 10).

## Discussion

This cross-sectional survey conducted among family physicians and paediatricians of the Niagara region provides an understanding of their knowledge, willingness, attitude and readiness regarding oral health care for their pediatric patients. With a very high response rate, contributed to the utilization of the Dillman method and improved communication with public health, this survey provides an understanding of what challenges and opportunities may be present in a primary care setting in improving the oral health status of children.

The results show that family physicians and paediatricians are knowledgeable about the importance of oral health in general such as health implications of untreated decay and importance of baby teeth. Also, they understand the importance of healthy oral health practices such as tooth brushing and healthy eating. However, they are less informed about visible decay, identifying it, and counseling parents, which are all normal practices for a dentist. This is evident from responses to questions that tested this knowledge and also from self-acknowledgement. This can also be a potential reason for a lack of formal referrals to dentists, as PHC providers might not be confident enough in filling out the referral form. Importantly though, the majority were willing to formally refer suspected cases of tooth decay to dentists. They were also willing to obtain more education about preventive measures such as fluoride varnish. Regarding fluoride usage, responses suggest that PHC providers are not advising parents to use fluoridated toothpaste for their children. As well, the majority never prescribes fluoride supplements. Such responses could be expected, considering that a large proportion were not aware that the community water supply in the Niagara region is not fluoridated.

Including oral health modules in medical schools' curriculum can enhance the knowledge and capacity of future PHC providers to address the oral health of their paediatric patients more confidently. A general movement towards cross-discipline training would positively impact this issue. Having dental academics teach medical students and having them practice basic acts such

1  
2  
3 as examining the teeth, providing oral health anticipatory guidance, and applying fluoride  
4 varnish would likely be a more effective approach to learning, and understanding the PHC  
5 provider's role around oral health.  
6

7  
8 With this educational gap identified, it provides an opportunity to engage with PHC providers to  
9 improve their oral health knowledge. As part of Continuing Professional Development (CPD),  
10 accredited courses or workshops could focus on the oral health of children where PHC providers  
11 can receive credits as part of their continuing medical education. Literature suggests that such  
12 courses can reduce prominent knowledge deficits.<sup>23</sup> Also, CPD can facilitate acquisition and  
13 retention of positive attitudes for better clinical outcomes.<sup>24</sup>  
14  
15

16 Overall, survey responses reflect a positive attitude and willingness of family physicians and  
17 paediatricians regarding the oral health of children. In order to capitalize on this, there is a need  
18 to identify mechanisms of providing preventive oral health care services in offices of PHC  
19 providers; this would include improving their knowledge about oral health and addressing other  
20 potential barriers for facilitating provision of such services. Recommendations include:  
21

- 22 1. As been exemplified in the United States, there needs to be advocacy to the Ministry  
23 level for primary health care providers to be reimbursed for providing fluoride varnish  
24 applications to children  
25
- 26 2. Local public health units engage with PHC providers to determine readiness and  
27 feasibility in implementing a fluoride varnish strategy  
28
- 29 3. Continue to provide the option of continue medical education credits to participate in oral  
30 health education  
31

## 32 **Conclusions**

33  
34 The oral health of children is important and a demonstrated public health issue in Niagara region.  
35 Since PHC providers have frequent contact with children, they are in an optimal position to  
36 provide preventive oral health care services and education to children and families. Across  
37 Ontario, public health units are in an optimal position to engage with local PHC providers to  
38 equip them with education around the importance of oral health and support them in  
39 implementing a preventive strategy. For a paediatric oral health strategy to be successful, it  
40 needs to be cross-disciplinary to address both the preventive and clinical aspects to benefit the  
41 paediatric patient. PHC providers are willing to learn more about oral health and recognize its  
42 value and importance – this should be capitalized on.  
43  
44  
45  
46  
47  
48  
49  
50  
51  
52  
53  
54  
55  
56  
57  
58  
59  
60



## References

1. Petersen PE. The World Oral Health Report 2003, Continuous improvement of oral health in the 21st century - the approach of the WHO Global Oral Health Programme
2. Health Canada. Report on the findings of the oral health component of the Canadian Health Measures Survey, 2007-2009. Ottawa: Minister of Health, 2010.
3. Muirhead VE, Quiñonez C, Figueiredo R, Locker D. Predictors of dental care utilization among working poor Canadians. *Community Dent Oral Epidemiol.* 2009;37(3):199-208.
4. Bedos C, Brodeur JM, Benigeri M, Olivier M. [Utilization of preventive dental services by recent immigrants in Quebec]. *Canadian journal of public health = Revue canadienne de sante publique* 2004; **95**(3): 219-23.
5. Patrick DL, Lee RS, Nucci M, Grembowski D, Jolles CZ, Milgrom P. Reducing oral health disparities: a focus on social and cultural determinants. *BMC oral health* 2006; **6 Suppl 1**: S4.
6. Canadian Pediatric Society, Position Statement, Oral Health Care for Children – A call for action, Jan 11 2013, <http://www.cps.ca/documents/position/oral-health-care-for-children>.
7. Oral Health – More Than Just Cavities, A Report by Ontario’s Chief Medical Officer of Health, April 2012, [http://www.health.gov.on.ca/en/common/ministry/publications/reports/oral\\_health/oral\\_health.pdf](http://www.health.gov.on.ca/en/common/ministry/publications/reports/oral_health/oral_health.pdf).
8. Gabriella Di Giuseppe, Carmelo GA Nobile, Alessandra Marinelli, Italo F Angelillo. Knowledge, attitude and practices of pediatricians regarding the prevention of oral diseases in Italy, *BMC Public Health* 2006, **6**:176.
9. American Academy of Pediatrics Schedule of Well-Child Care Visits, <https://www.healthychildren.org/English/family-life/health-management/Pages/Well-Child-Care-A-Check-Up-for-Success.aspx> (accessed on January 17 2016).
10. American Academy of Pediatrics. Profile of pediatric visits: Tables 9–10 [based on 2000–2005 Medical Expenditure Panel Survey and 2000–2004 National Ambulatory Medical Care Survey]. Updated June 2008. Available at: <http://practice.aap.org/public/ProfileOfPediatricVisits.pdf>.
11. dela Cruz GG, Rozier RG, Slade G. Dental screening and referral of young children by pediatric primary care providers. *Pediatrics* 2004; **114**(5): e642-52.
12. Krol DM. Educating pediatricians on children's oral health: past, present, and future. *Pediatrics* 2004; **113**(5): e487-92.
13. Lewis CW, Grossman DC, Domoto PK, Deyo RA. The role of the pediatrician in the oral health of children: A national survey. *Pediatrics* 2000, **106**:E84.
14. Gift HC, Milton B, Walsh V. Physician and caries prevention. Results of a physician survey on preventive dental services. *JAMA* 1984; **252**:1447-8.
15. Sanchez OM, Childers NK, Fox L, Bradley E. Physicians' views on pediatric preventive dental care. *Pediatr Dent* 1997; **19**(6): 377-83.
16. Prakash P, Lawrence HP, Harvey BJ, McIsaac WJ, Limeback H, Leake JL. Early childhood caries and infant oral health: Paediatricians' and family physicians' knowledge, practices and training. *Paediatr Child Health* 2006; **11**(3): 151-7.
17. Helfenstein U, M. S. Fluoride varnishes (Duraphat): a metaanalysis. *Commun Dent Oral Epidemiol.* 1994; **22**:1–5.
18. Quinonez RB, Stearns SC, Talekar BS, Rozier RG, Downs SM. Simulating cost-effectiveness of fluoride varnish during well-child visits for Medicaid-enrolled children. *Archives of pediatrics & adolescent medicine* 2006; **160**(2): 164-70.
19. The Pew Charitable Trusts, Research & Analysis, Reimbursing Physicians for Fluoride Varnish, Children's Dental Policy , August 29, 2011 <http://www.pewtrusts.org/en/research-and-analysis/analysis/2011/08/29/reimbursing-physicians-for-fluoride-varnish> updated 2015 (accessed on Nov 19 2015).

- 1
- 2
- 3
- 4 20. Hawkins R, Noble J, Locker D, et al. A comparison of the costs and patient acceptability of
- 5 professionally applied topical fluoride foam and varnish. *Journal of public health dentistry* 2004; **64**(2):
- 6 106-10.
- 7 21. Swan E. Dietary fluoride supplement protocol for the new millennium. *Journal* 2000; **66**(7): 362;
- 8 discussion 3.
- 9 22. Hoddinott SN, Bass MJ. The dillman total design survey method. *Canadian family physician*
- 10 *Medecin de famille canadien* 1986; **32**: 2366-8.
- 11 23. Marinopoulos SS, Dorman T, Ratanawongsa N, et al. Effectiveness of continuing medical
- 12 education. *Evidence report/technology assessment* 2007; (149): 1-69.
- 13 24. Davis N, Davis D, Bloch R. Continuing medical education: AMEE Education Guide No 35.
- 14 *Medical teacher* 2008; **30**(7): 652-66.
- 15 25. Canadian Dental Association. CDA Position Statement on Use of Fluoride in Caries Prevention,
- 16 2005.
- 17
- 18
- 19
- 20
- 21
- 22
- 23
- 24
- 25
- 26
- 27
- 28
- 29
- 30
- 31
- 32
- 33
- 34
- 35
- 36
- 37
- 38
- 39
- 40
- 41
- 42
- 43
- 44
- 45
- 46
- 47
- 48
- 49
- 50
- 51
- 52
- 53
- 54
- 55
- 56
- 57
- 58
- 59
- 60

Confidential

**Table 1. Dosage of daily fluoride supplements based on fluoride in water supply**

| <b>Age of child</b>  | <b>&lt; 0.3 ppm</b> | <b>≥ 0.3 ppm</b> |
|----------------------|---------------------|------------------|
| 0 – 6 months         | None                | None             |
| > 6 months – 3 years | 0.25 mg/day         | None             |
| > 3 years – 6 years  | 0.5 mg/day          | None             |
| > 6 years            | 1.0 mg/day          | None             |

Source: Canadian Dental Association<sup>25</sup>

Confidential

1  
2  
3  
4  
5  
6  
7  
8  
9  
10  
11  
12  
13  
14  
15  
16  
17  
18  
19  
20  
21  
22  
23  
24  
25  
26  
27  
28  
29  
30  
31  
32  
33  
34  
35  
36  
37  
38  
39  
40  
41  
42  
43  
44  
45  
46  
47  
48  
49  
50  
51  
52  
53  
54  
55  
56  
57  
58  
59  
60

**Table 2. Responses from three mailings**

| <b>Mailing (N)</b> | <b>Returned N (%)</b> |
|--------------------|-----------------------|
| First (265)        | 161 (60.7%)           |
| Second (104)       | 16 (6.1%)             |
| Third (88)         | 4 (1.5%)              |
| Total (265)        | 181 (68.3%)           |

Confidential

**Table 3. Characteristics of family physicians and pediatricians**

| <b>Practice characteristics</b>                          | <b>Family physicians<br/>Percent (%)</b> | <b>Pediatricians<br/>Percent (%)</b> |
|----------------------------------------------------------|------------------------------------------|--------------------------------------|
| <b>Years of practice</b>                                 |                                          |                                      |
| <10 years                                                | 20.8                                     | 17.6                                 |
| 10-19 years                                              | 22.5                                     | 23.5                                 |
| 20 years or more                                         | 56.7                                     | 58.8                                 |
| <b>Type of practice</b>                                  |                                          |                                      |
| Solo                                                     | 27.6                                     | 94.1                                 |
| Group                                                    | 72.4                                     | 5.9                                  |
| <b>Model of primary practice (can be more than one)*</b> |                                          |                                      |
| Comprehensive Care Model                                 | 3.0                                      | 41.2                                 |
| Community Health Centre                                  | 2.4                                      | 0.0                                  |
| Family Health Group                                      | 28.0                                     | 5.9                                  |
| Family Health Organization                               | 34.8                                     | 0.0                                  |
| Family Health Network                                    | 5.5                                      | 0.0                                  |
| Family Health Team                                       | 26.2                                     | 0.0                                  |
| Other                                                    | 9.1                                      | 47.1                                 |
| <b>Type of staff in office*</b>                          |                                          |                                      |
| Nurse                                                    | 58.0                                     | 25.0                                 |
| Nurse Practitioner                                       | 32.7                                     | 6.3                                  |
| Physician Assistant                                      | 6.8                                      | 0.0                                  |
| Office Manager                                           | 61.1                                     | 31.3                                 |
| Administrative Staff                                     | 94.4                                     | 81.3                                 |
| Other                                                    | 33.3                                     | 18.8                                 |

\*Note: percentages may add up to >100% because participants were allowed to select more than one response

**Table 4. Knowledge about ECC, community water fluoridation, and topical fluorides**

|                                                                                                                 | <b>Family physicians Agree or strongly agree (%)</b> | <b>Pediatricians Agree or strongly agree (%)</b> |
|-----------------------------------------------------------------------------------------------------------------|------------------------------------------------------|--------------------------------------------------|
| <b>Knowledge about ECC</b>                                                                                      |                                                      |                                                  |
| Untreated tooth decay could affect the general health of a child                                                | 100.0                                                | 93.8                                             |
| Parents should brush their young children's teeth twice a day                                                   | 98.2                                                 | 100.0                                            |
| The first signs of tooth decay are white spots or lines on the tooth surfaces                                   | 33.5                                                 | 50.0                                             |
| Baby teeth are important even though they fall out                                                              | 96.3                                                 | 100.0                                            |
| Children should have 3 meals and 2-3 snacks per day                                                             | 92.0                                                 | 87.5                                             |
| Parents should limit juice to 4-6 ounces per day                                                                | 88.3                                                 | 87.5                                             |
| I feel confident enough to identify tooth decay in children.                                                    | 57.9                                                 | 81.3                                             |
| I feel knowledgeable enough to discuss and counsel parents/caregivers regarding their children's dental hygiene | 71.4                                                 | 81.3                                             |
| <b>Knowledge about community water fluoridation and topical fluorides</b>                                       |                                                      |                                                  |
| Community water fluoridation is important for preventing tooth decay                                            | 88.4                                                 | 93.8                                             |
| Topical fluoride therapies are important for preventing tooth decay                                             | 77.6                                                 | 93.8                                             |
| <b>Awareness of community water fluoridation</b>                                                                |                                                      |                                                  |
| Water supplies in the Niagara Region <u>are not</u> fluoridated                                                 | 47.2                                                 | 64.7                                             |

**Table 5. Preventive oral-health care practices in medical settings**

|                                                                | Family physicians |                |               | Pediatricians |                |               |
|----------------------------------------------------------------|-------------------|----------------|---------------|---------------|----------------|---------------|
|                                                                | Never (%)         | 1-50% patients | >50% patients | Never (%)     | 1-50% patients | >50% patients |
| Visually examine the oral cavity?                              | 3.2               | 16.5           | 80.3          | 12.5          | 6.3            | 81.3          |
| Visually examine the teeth?                                    | 5.7               | 32.1           | 62.2          | 18.8          | 12.5           | 78.8          |
| Determine the child's risk for developing tooth decay?         | 23.7              | 40.3           | 35.9          | 25.0          | 0.0            | 75.0          |
| Advise parents/caregivers on tooth cleaning methods?           | 20.5              | 39.8           | 39.8          | 18.8          | 43.7           | 37.5          |
| Advise parents/caregivers on the use of bottles or sippy cups? | 9.5               | 24.1           | 66.5          | 18.8          | 6.3            | 75.0          |
| Advise parents/caregivers on the use of fluoride toothpaste?   | 26.1              | 23.6           | 50.3          | 18.8          | 31.2           | 50.0          |
| Prescribe fluoride supplements?                                | 77.6              | 16.0           | 6.4           | 68.8          | 25.0           | 6.2           |

**Table 6. Willingness of family physicians to preform preventive oral health care activities**

| Willingness to preform preventive oral health measures                                         | Most Willing (%) |      |      |      |      | Least willing (%) |
|------------------------------------------------------------------------------------------------|------------------|------|------|------|------|-------------------|
|                                                                                                | 1                | 2    | 3    | 4    | 5    |                   |
| Lift the child's top lip to check for tooth decay.                                             | 69.1             | 16.7 | 9.9  | 3.7  | 0.6  |                   |
| Advise parents/caregivers regarding prevention measures for tooth decay (e.g. tooth brushing). | 74.1             | 14.2 | 8.6  | 2.5  | 0.6  |                   |
| Formally refer suspected cases of tooth decay to dental professionals.                         | 46.2             | 22.4 | 19.2 | 6.4  | 5.8  |                   |
| Obtain more education about prevention measures for tooth decay (e.g. fluoride varnish).       | 41.3             | 26.9 | 16.9 | 6.9  | 8.1  |                   |
| Implement prevention measures for tooth decay (e.g. fluoride varnish).                         | 30.0             | 16.3 | 18.8 | 14.4 | 20.6 |                   |

Confidential



**Table 7. Willingness of pediatricians to preform preventive oral health care activities**

| Willingness to preform preventive oral health measures                                         | Most Willing (%) |      |      |      | Least willing (%) |
|------------------------------------------------------------------------------------------------|------------------|------|------|------|-------------------|
|                                                                                                | 1                | 2    | 3    | 4    | 5                 |
| Lift the child's top lip to check for tooth decay.                                             | 81.3             | 6.3  | 0.0  | 0.0  | 12.5              |
| Advise parents/caregivers regarding prevention measures for tooth decay (e.g. tooth brushing). | 87.5             | 0.0  | 0.0  | 0.0  | 12.5              |
| Formally refer suspected cases of tooth decay to dental professionals.                         | 56.3             | 6.3  | 12.5 | 0.0  | 25.0              |
| Obtain more education about prevention measures for tooth decay (e.g. fluoride varnish).       | 37.5             | 31.3 | 6.3  | 12.5 | 12.5              |
| Implement prevention measures for tooth decay (e.g. fluoride varnish).                         | 18.8             | 12.5 | 18.8 | 6.3  | 43.8              |

Confidential

**Table 8. Steps family physicians and pediatricians take to identify a child with tooth decay**

| Steps taken (can be more than one)                         | Family physicians (%) | Pediatricians (%) |
|------------------------------------------------------------|-----------------------|-------------------|
| Advise the parent/caregiver to take the child to a dentist | 89.0                  | 94.1              |
| Make a note in the medical chart                           | 44.8                  | 68.8              |
| Give the parent/caregiver the name(s) of a dentist         | 23.9                  | 50.0              |
| Do not formally refer children to dentists                 | 8.6                   | 12.5              |
| Have never seen a child with tooth decay                   | 6.1                   | 6.3               |
| Make a formal referral to a dentist                        | 6.1                   | 0.0               |
| Other                                                      | 5.5                   | 18.8              |

Confidential

**Table 9. Reasons for not carrying out prevention measures aimed at dental problems**

| <b>Perceived barriers to carry prevention measures (can be more than one)</b> | <b>Family physicians (%)</b> | <b>Pediatricians (%)</b> |
|-------------------------------------------------------------------------------|------------------------------|--------------------------|
| Lack of clinical time                                                         | 65.8                         | 62.5                     |
| Dentists should perform these activities                                      | 42.2                         | 50.0                     |
| Lack of knowledge in identifying dental problems                              | 52.2                         | 25.0                     |
| Lack of office staff to assist in prevention measures                         | 37.3                         | 43.8                     |
| Lack of reimbursement                                                         | 36.6                         | 37.5                     |
| Lack of parent/caregiver's perceived need for dental care                     | 37.9                         | 31.3                     |
| Infants and toddlers are too young and uncooperative for oral examinations    | 23.0                         | 12.5                     |
| Other                                                                         | 9.9                          | 12.5                     |

Confidential

**Table 10. Attitude and willingness to perform oral health care activities**

| Most willing or willing to do following activities                                            | Practice's role in promoting oral health among children (%) |                               | P value |
|-----------------------------------------------------------------------------------------------|-------------------------------------------------------------|-------------------------------|---------|
|                                                                                               | Moderate to very important                                  | Unimportant to less important |         |
| Lift the child's top lip to check for tooth decay                                             | 88.3                                                        | 69.6                          | 0.016   |
| Advise parents/caregivers regarding prevention measures for tooth decay (e.g. tooth brushing) | 90.9                                                        | 69.6                          | 0.003   |
| Formally refer suspected cases of tooth decay to dental professionals                         | 71.3                                                        | 42.9                          | 0.009   |
| Obtain more education about prevention measures for tooth decay (e.g. fluoride varnish)       | 71.1                                                        | 47.0                          | 0.026   |
| Implement prevention measures for tooth decay (e.g. fluoride varnish)                         | 48.0                                                        | 21.7                          | 0.018   |
